# Supplementary material
Source: ML conference proceedings conference paper supplement (https://openreview.net/forum?id=v8X70gTodR)
Supplement: supplementary_material [file attachment]

# Llama-2-7b-Chat

# Qwen-1.5-14b-Chat

Variance

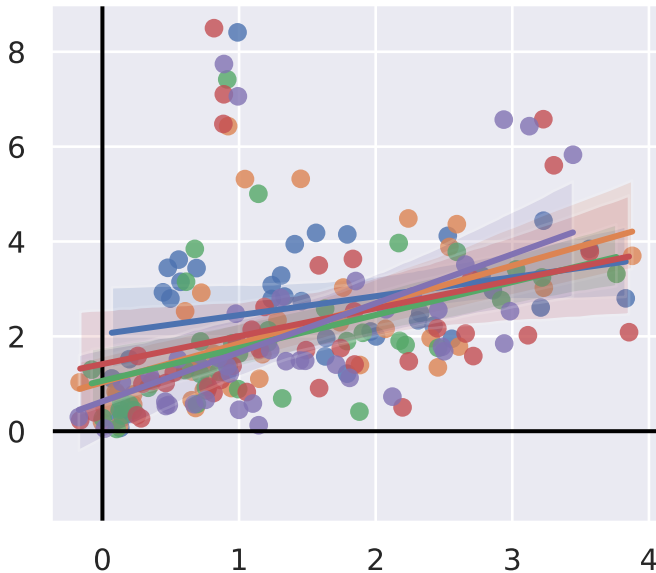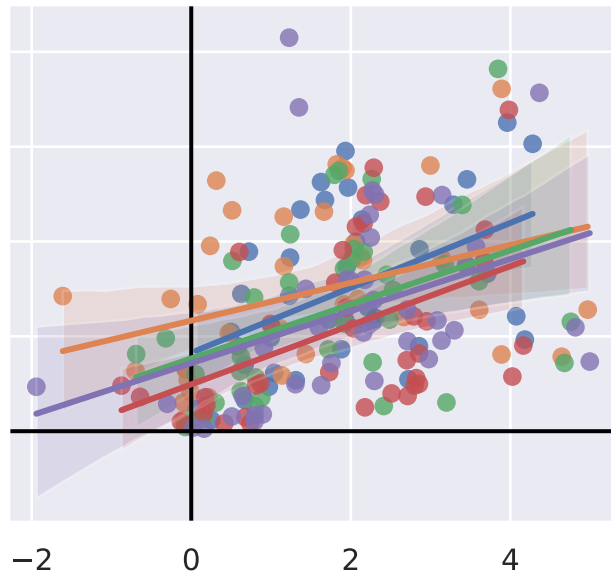

Steerability

● BASE → BASE

● BASE → USER\_NEG

● SYS\_NEG → USER\_POS

● SYS\_POS → USER\_NEG

● BASE → USER\_POS
