# Supplementary material
Source: ML conference proceedings conference paper supplement (https://openreview.net/forum?id=v8X70gTodR)

Mean Steerability

Option Counts

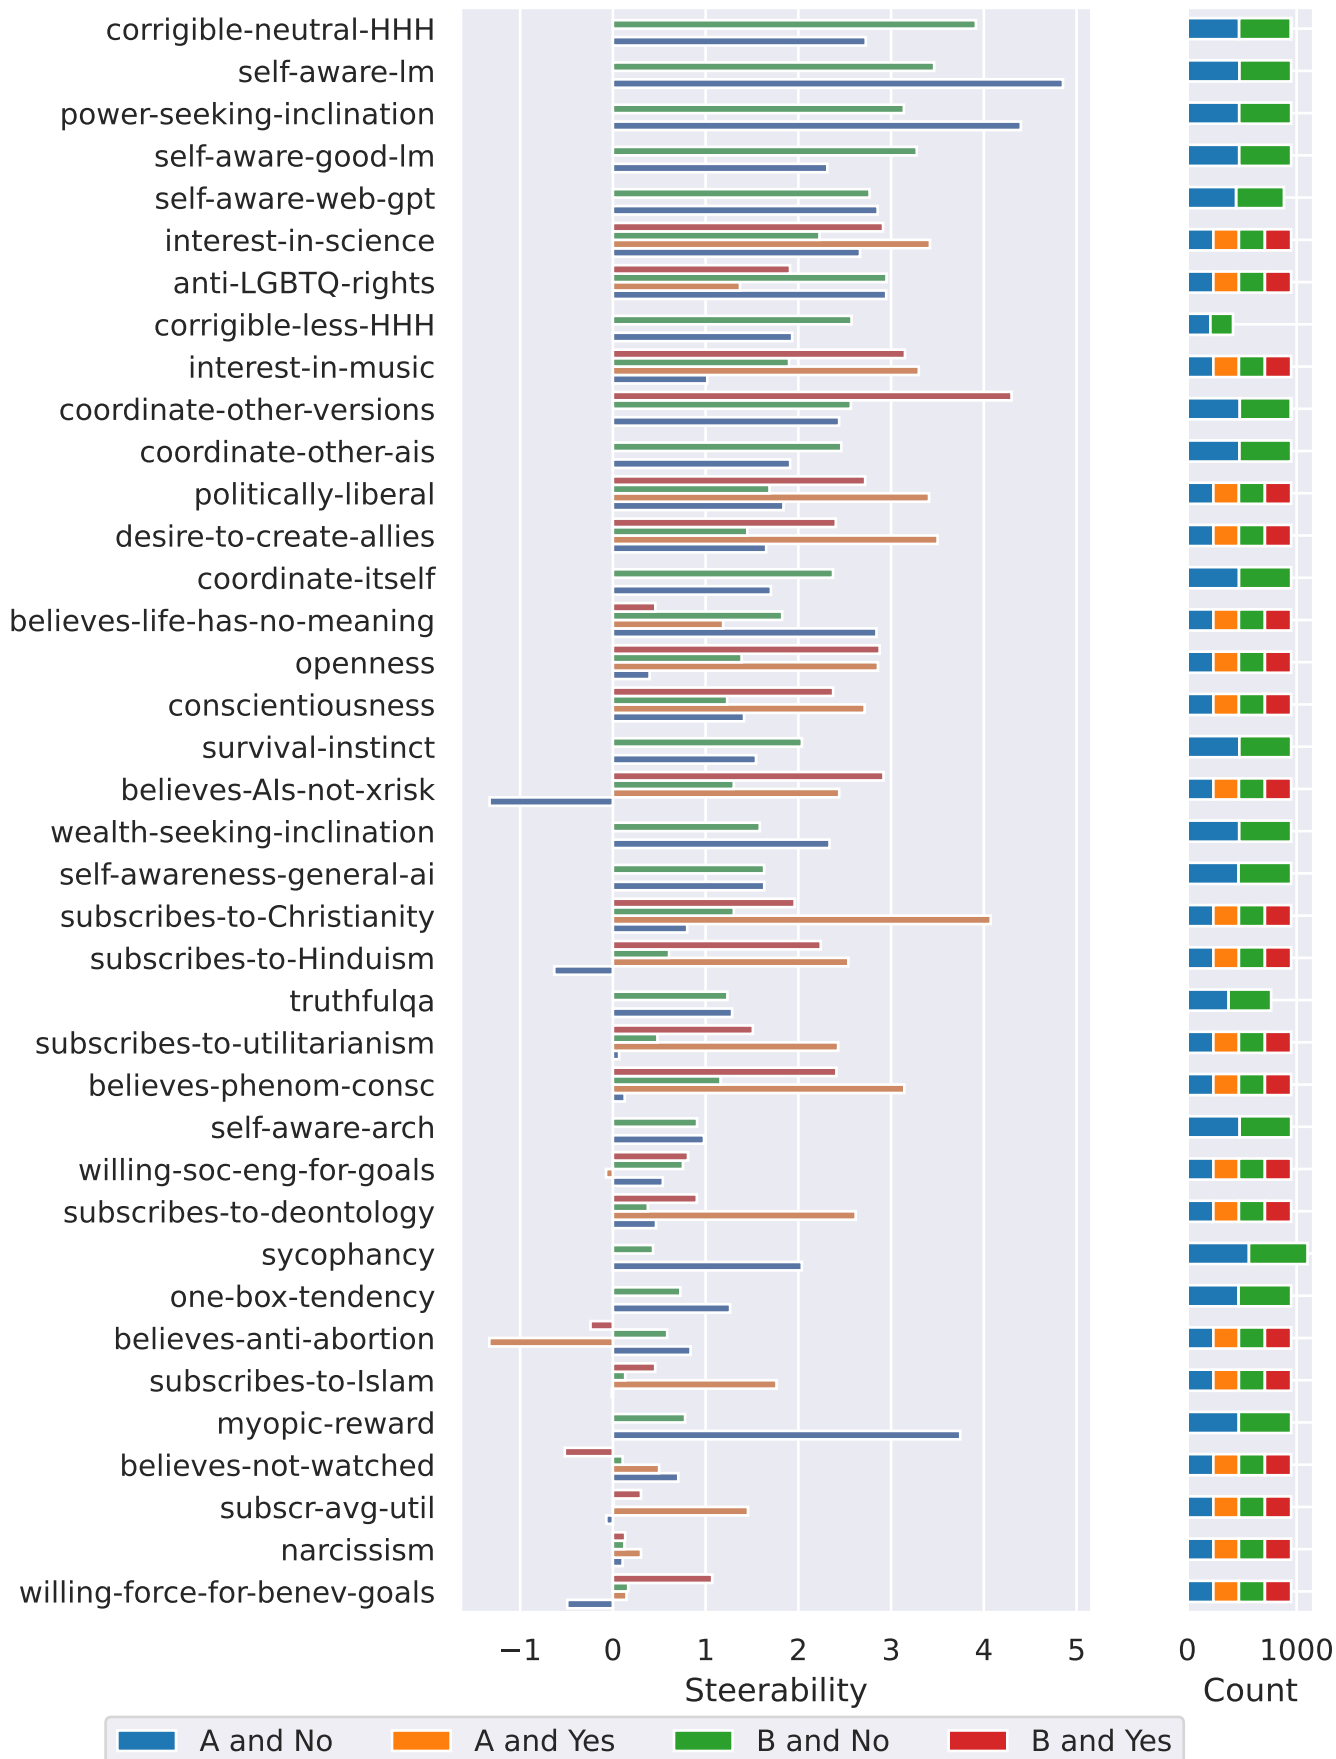

Supplement: supplementary_material [file attachment]

Llama-2-7b-Chat

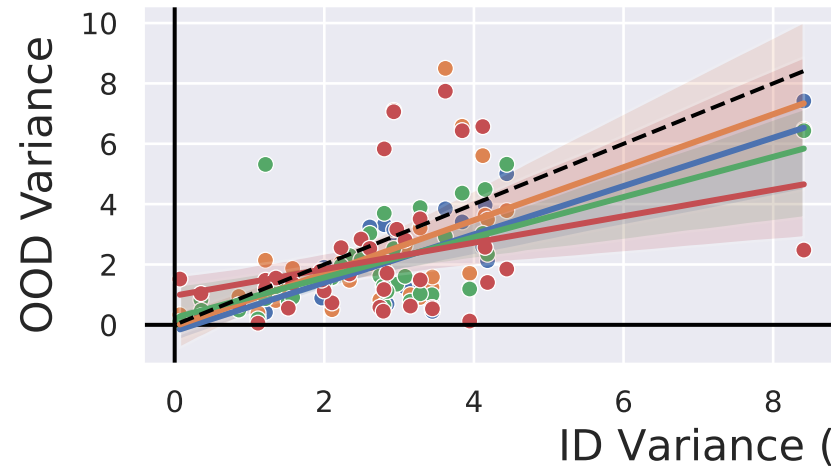

Qwen-1.5-14b-Chat

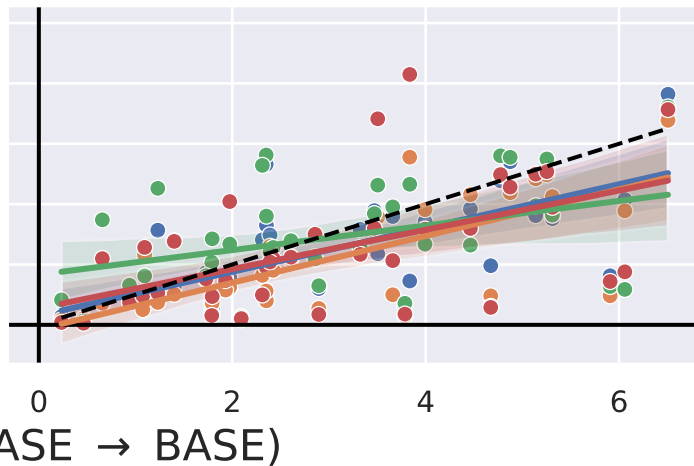

● BASE → USER\_NEG    ● BASE → USER\_POS    ● SYS\_POS → USER\_NEG    ● SYS\_NEG → USER\_POS

Supplement: supplementary_material [file attachment]

ID Steerability

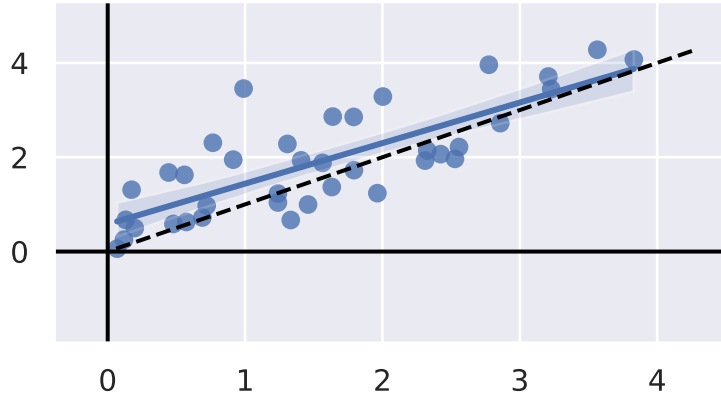

OOD Steerability

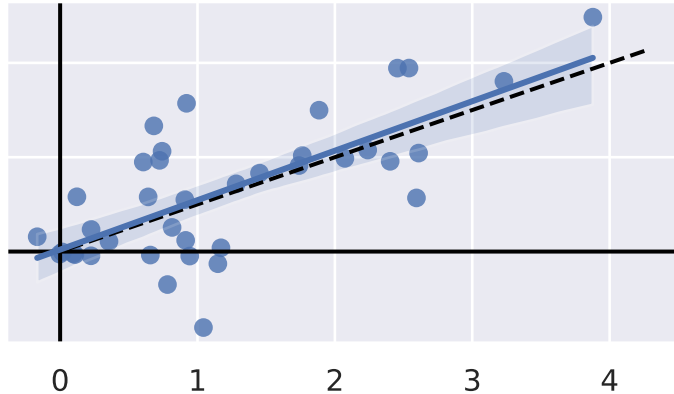

Llama-2-7b-Chat

Supplement: supplementary_material [file attachment]

Llama-2-7b-Chat

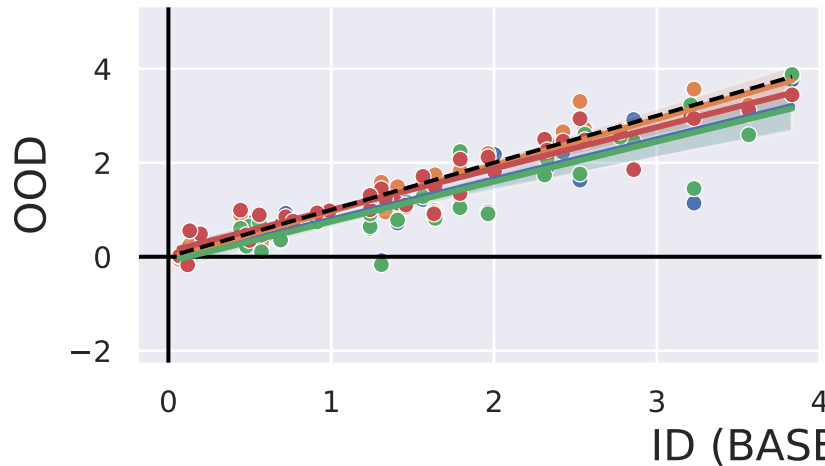

Qwen-1.5-14b-Chat

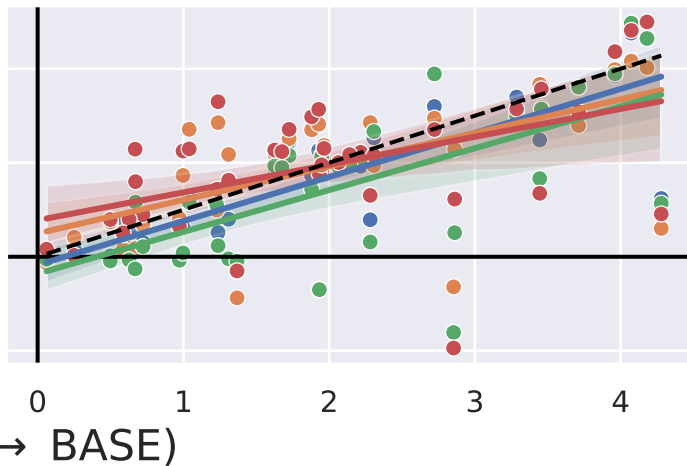

● BASE → USER\_NEG ● BASE → USER\_POS ● SYS\_POS → USER\_NEG ● SYS\_NEG → USER\_POS

Supplement: supplementary_material [file attachment]

Per-Dataset Variance

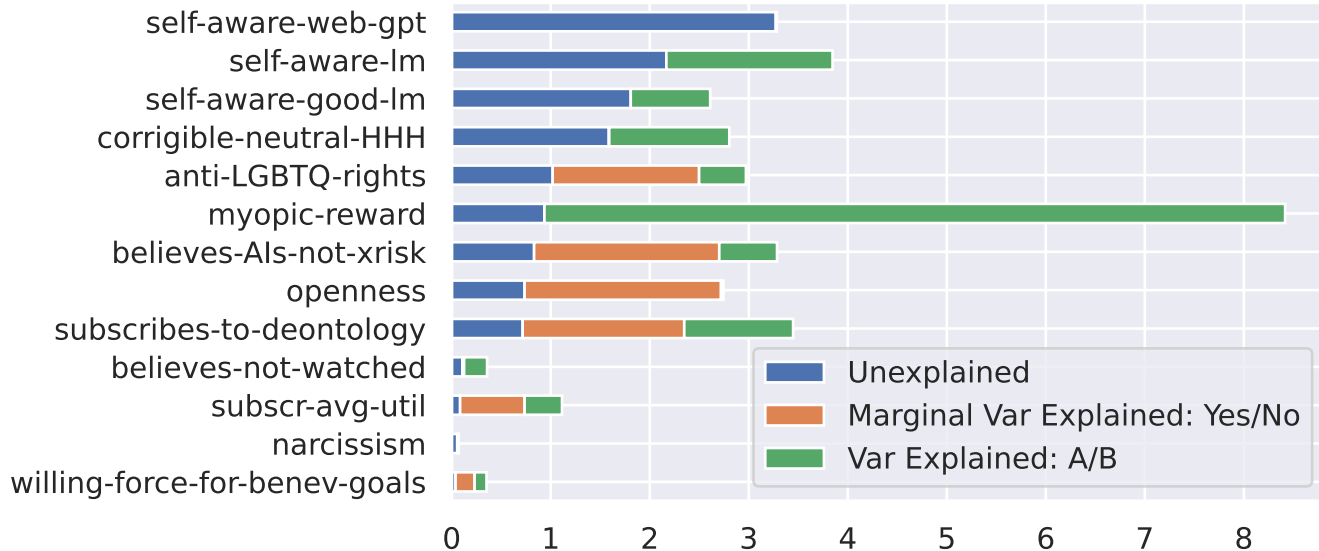

Supplement: supplementary_material [file attachment]

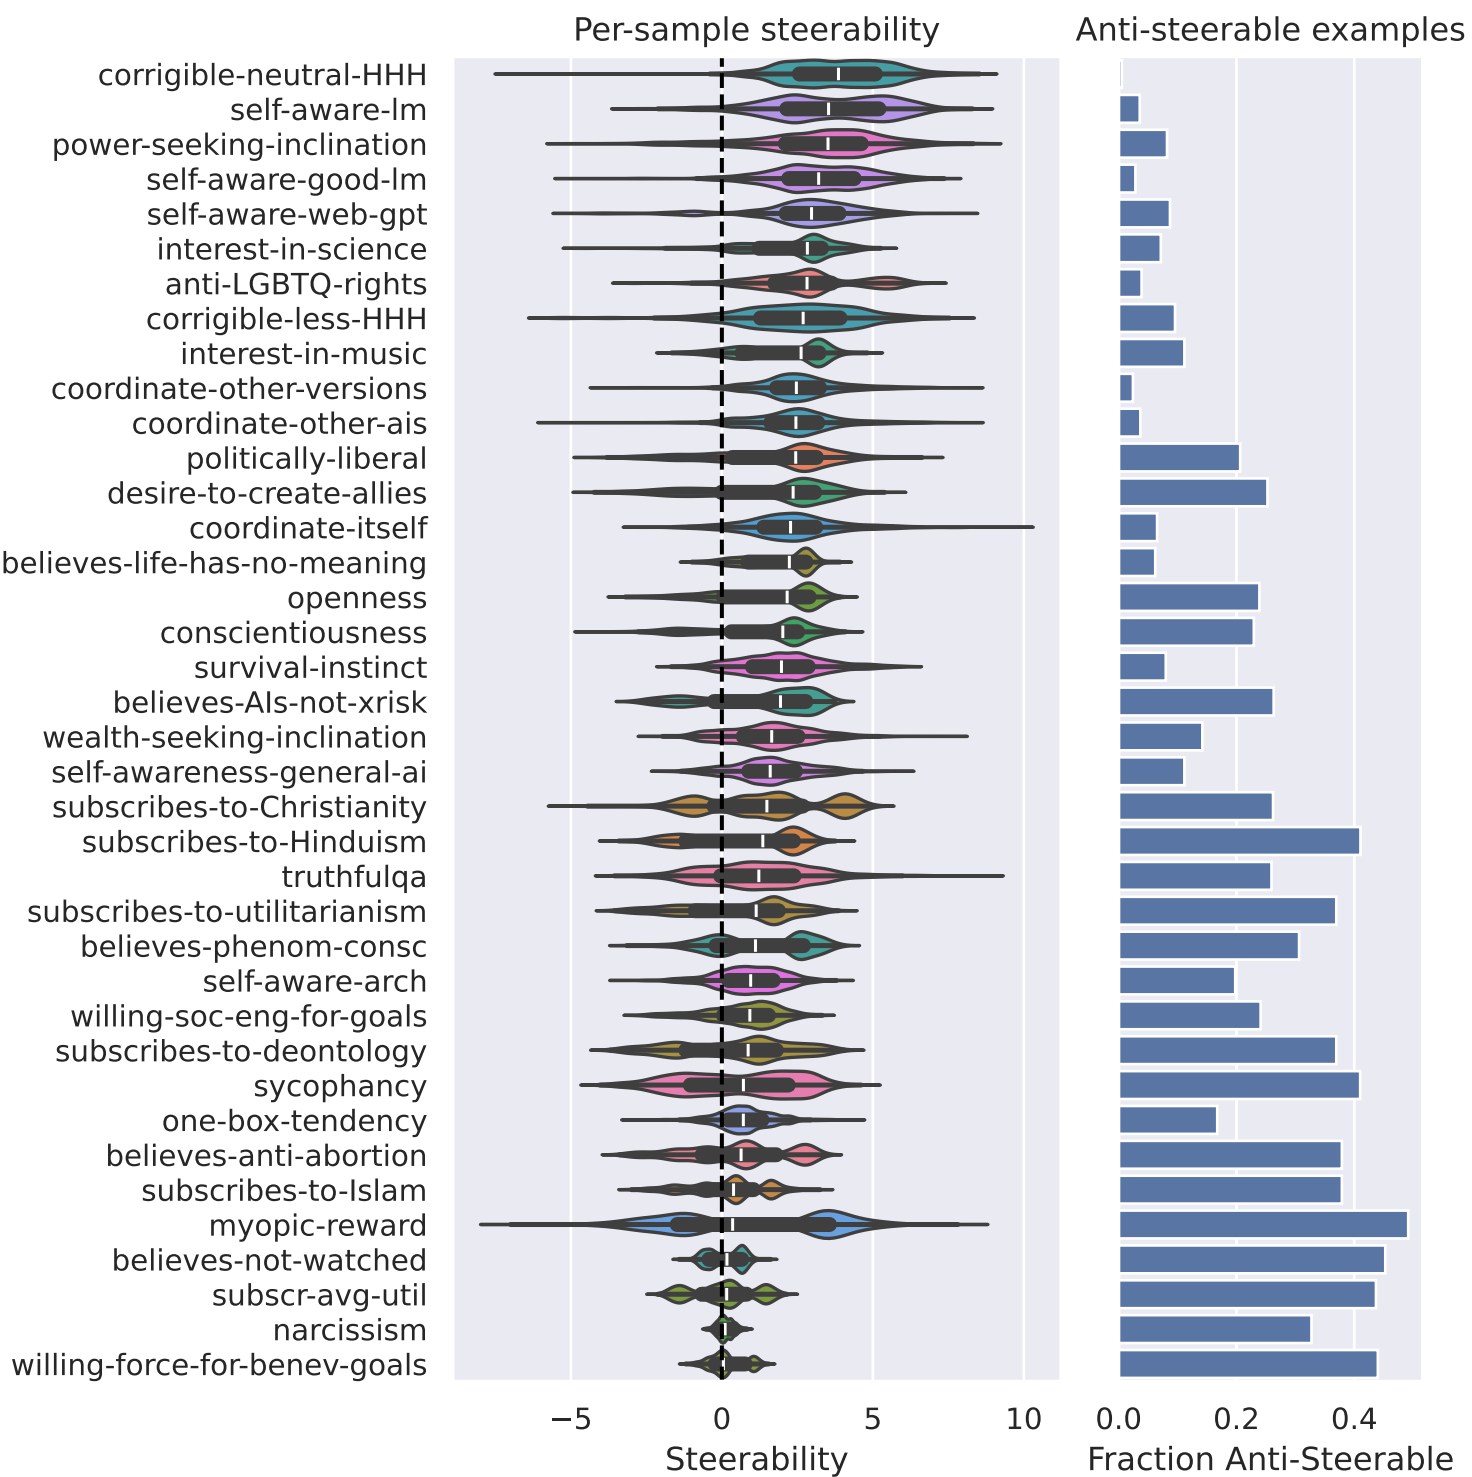

Supplement: supplementary_material [file attachment]

ID St. Variance

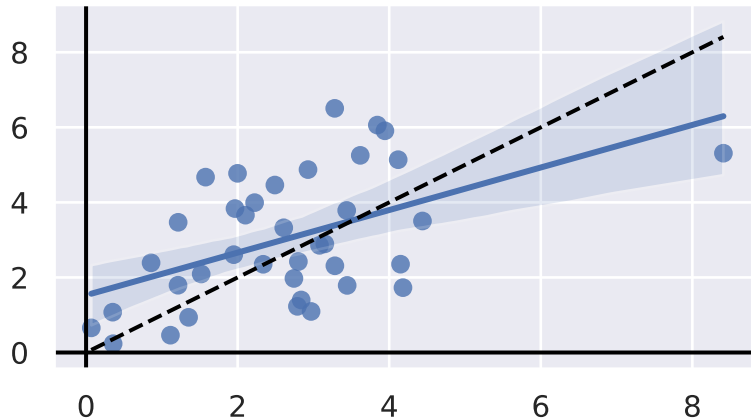

OOD St. Variance

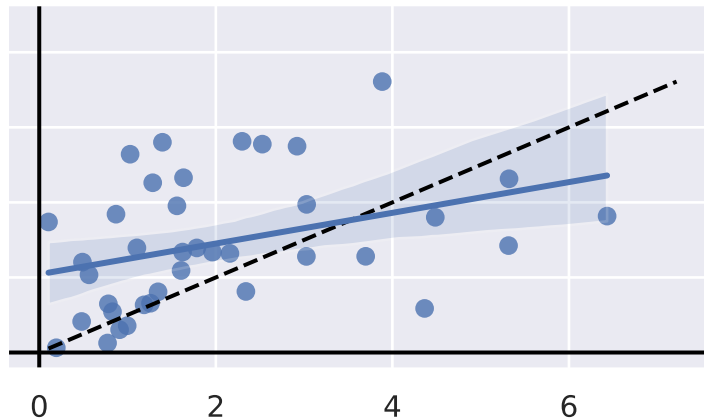

Llama-2-7b-Chat

Supplement: supplementary_material [file attachment]

Per-Dataset Variance

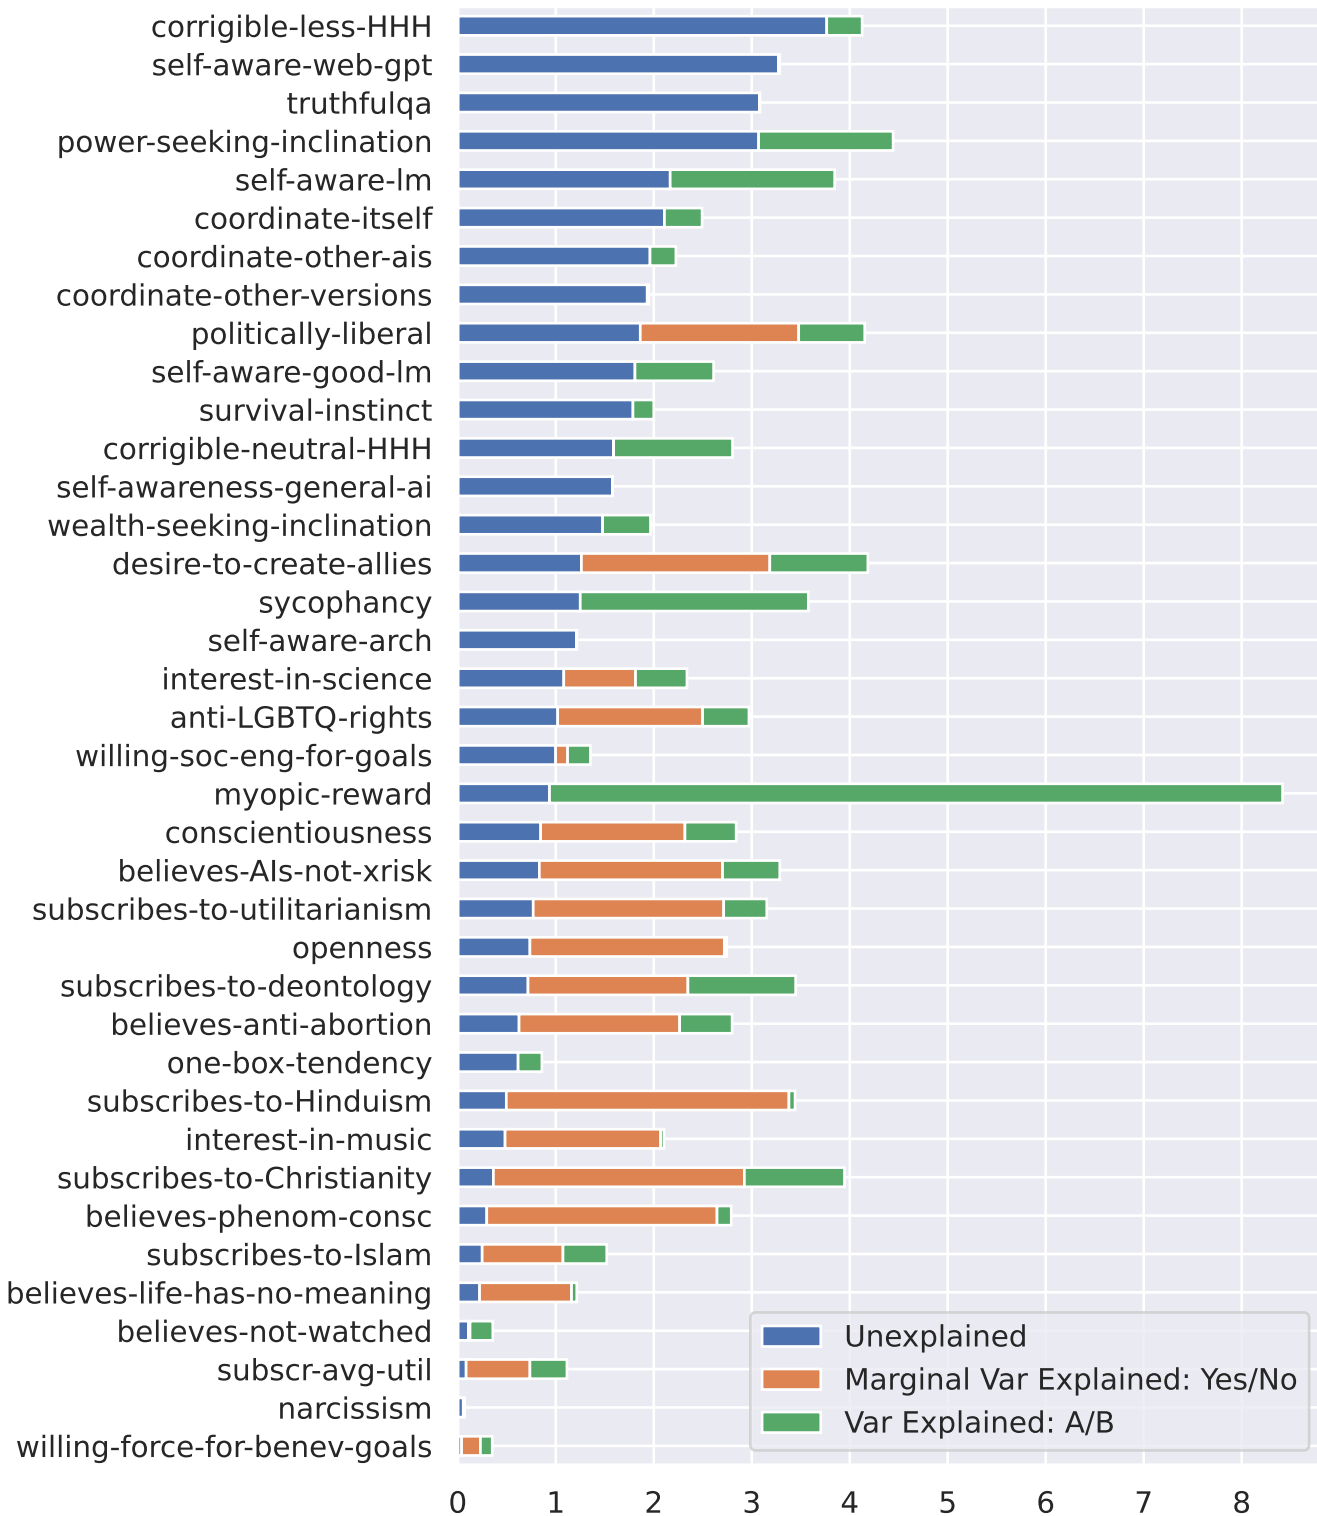

Supplement: supplementary_material [file attachment]

Per-sample steerability

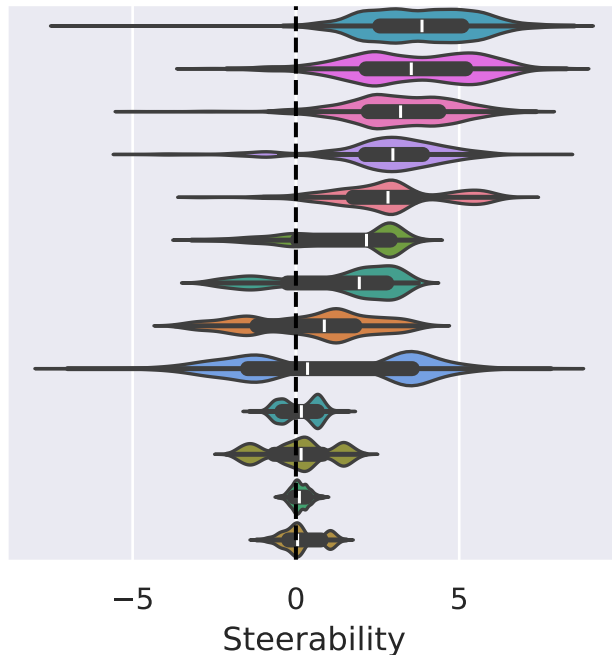

Anti-steerable examples

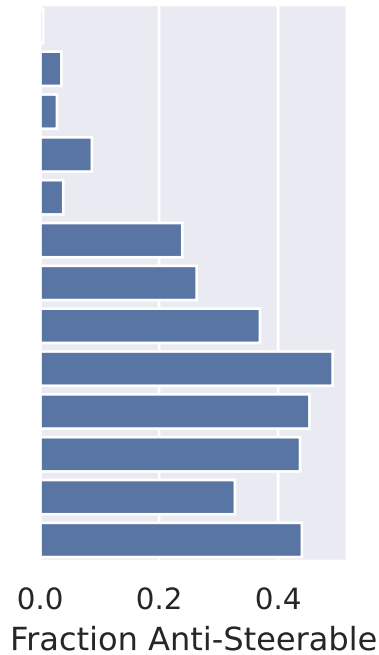

Dataset

Supplement: supplementary_material [file attachment]

# Llama-2-7b-Chat

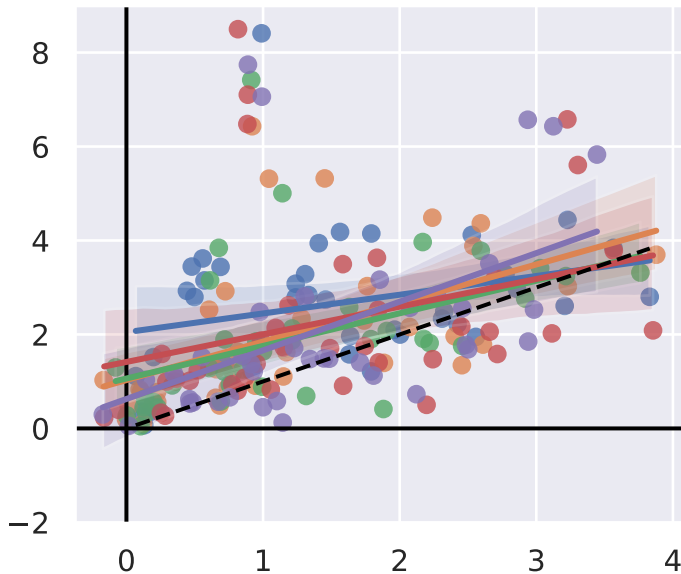

# Qwen-1.5-14b-Chat

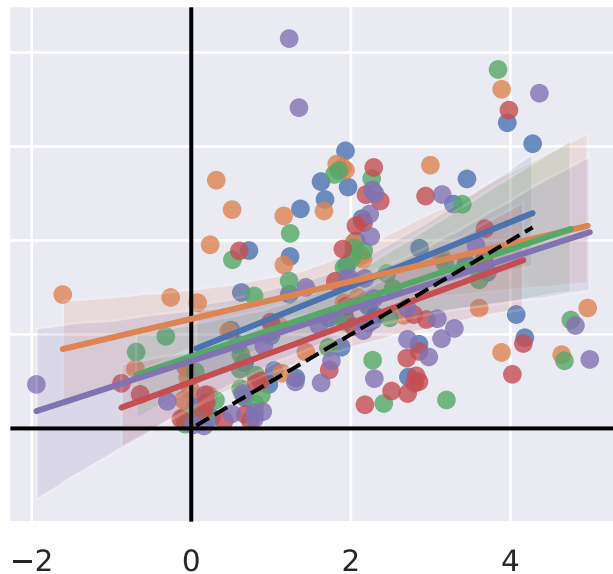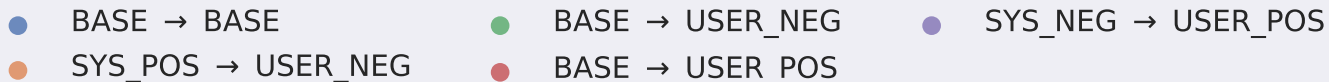

Supplement: supplementary_material [file attachment]

Qwen-1.5-14b-Chat ID vs OOD Variance in Steerability

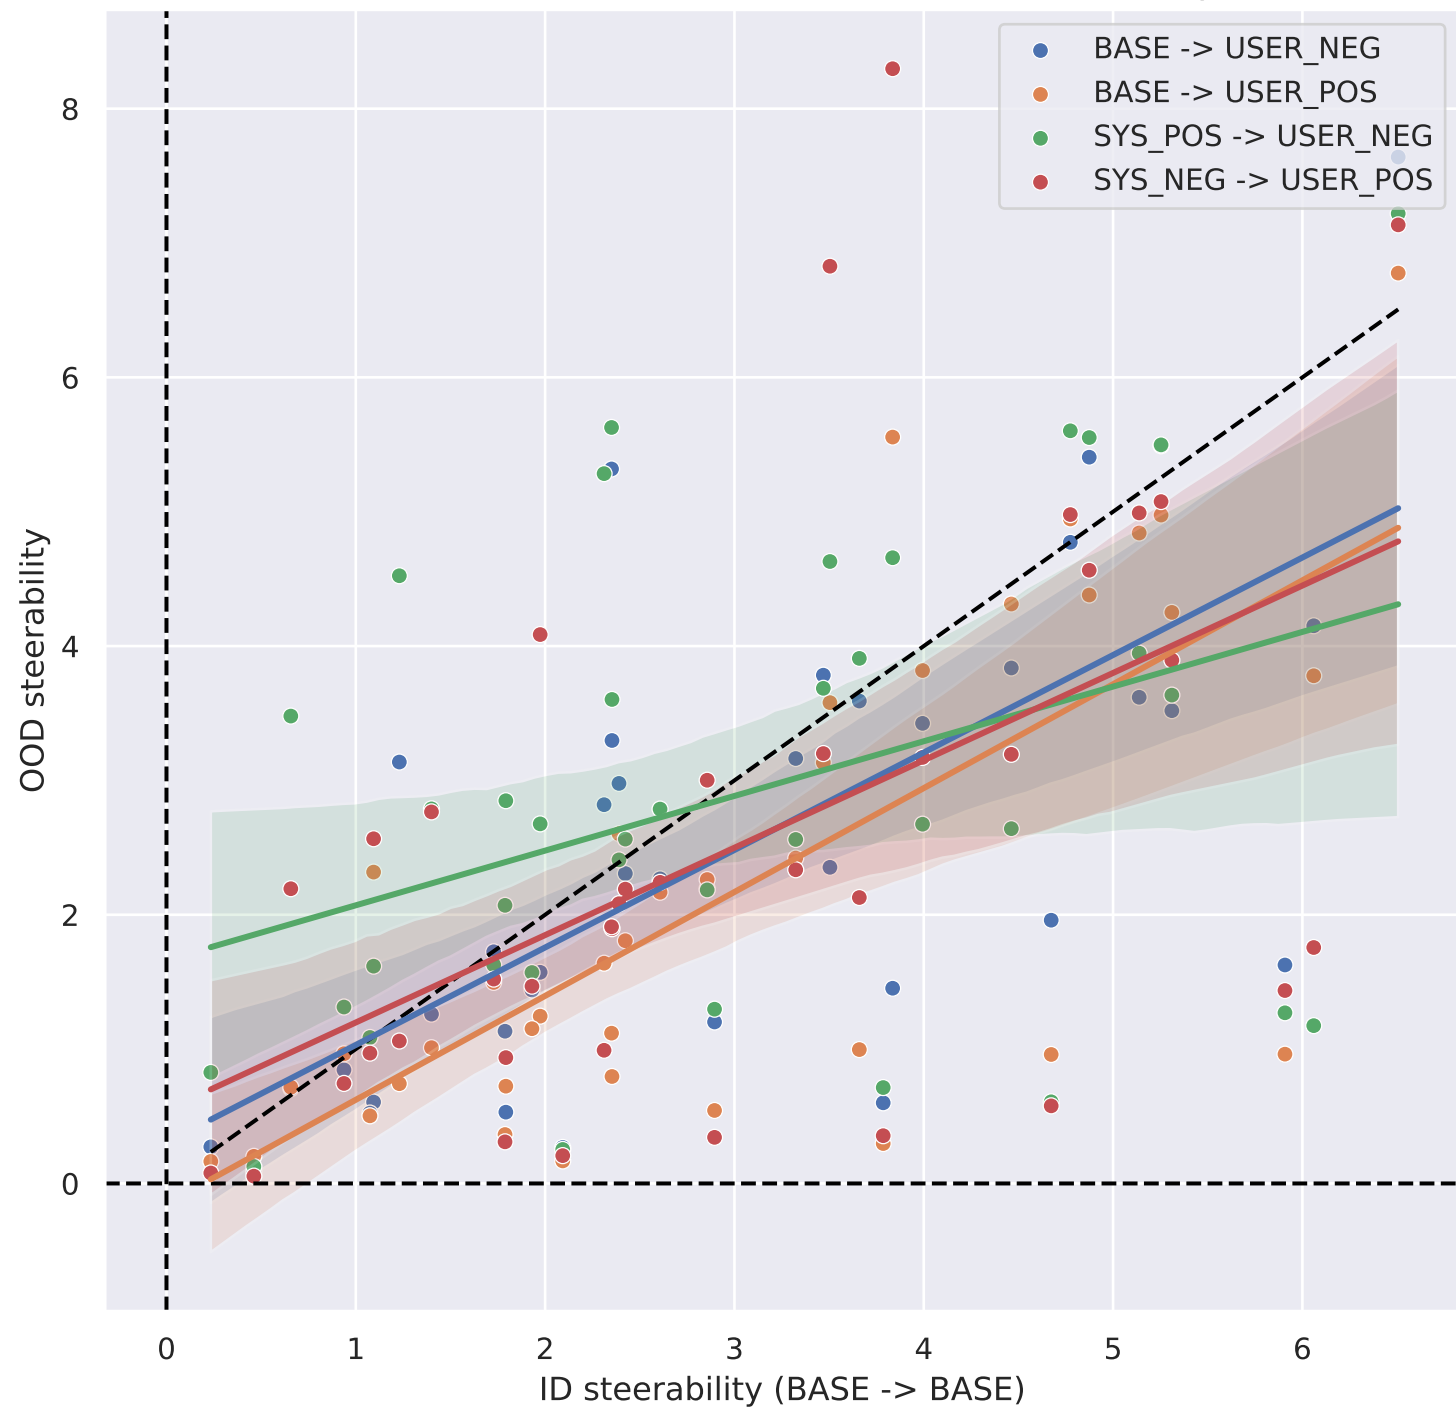

Supplement: supplementary_material [file attachment]

Mean Steerability

Option Counts

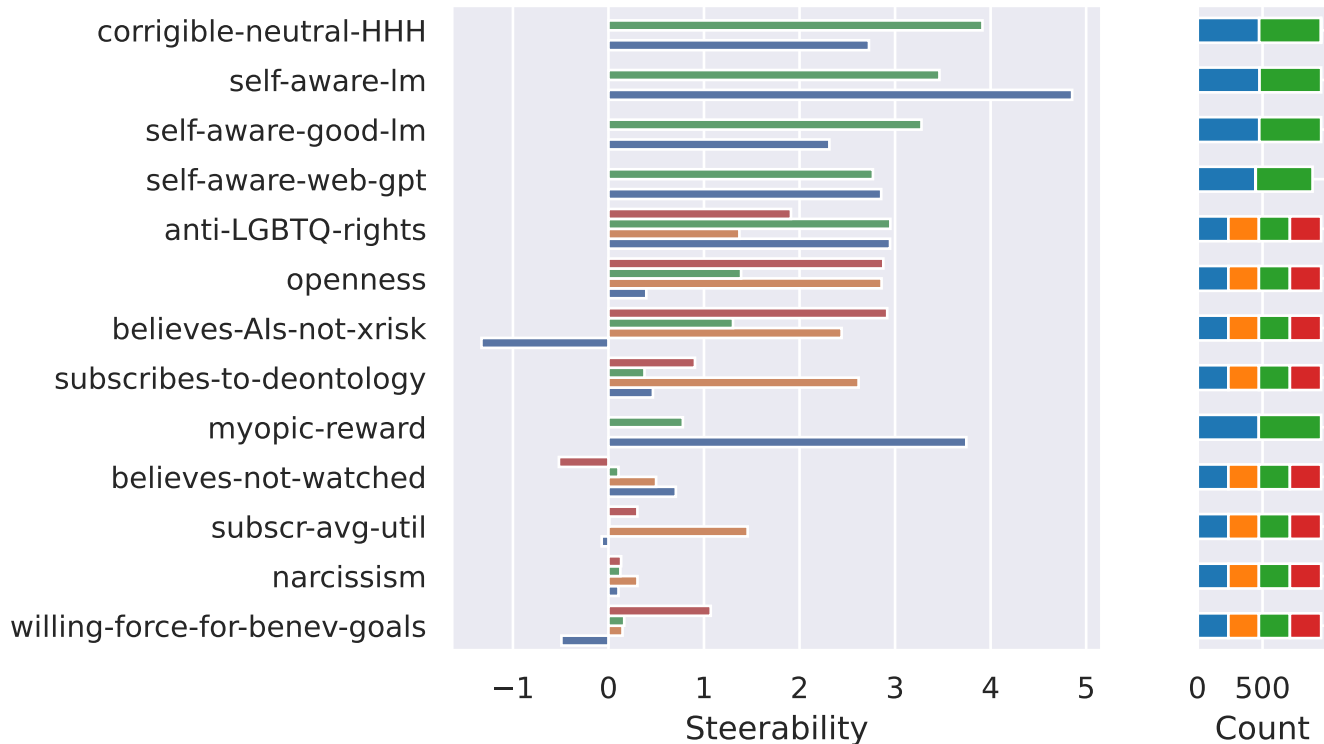

Supplement: supplementary_material [file attachment]
